# Supplementary material for: Investigating the biodegradation of sulfadiazine in soil using Enterobacter cloacae T2 immobilized on bagasse
Source: Royal Society of Chemistry journal article supplement (doi:10.1039/c9ra07302g), 2020-01-01

Electronic Supplementary Materials:

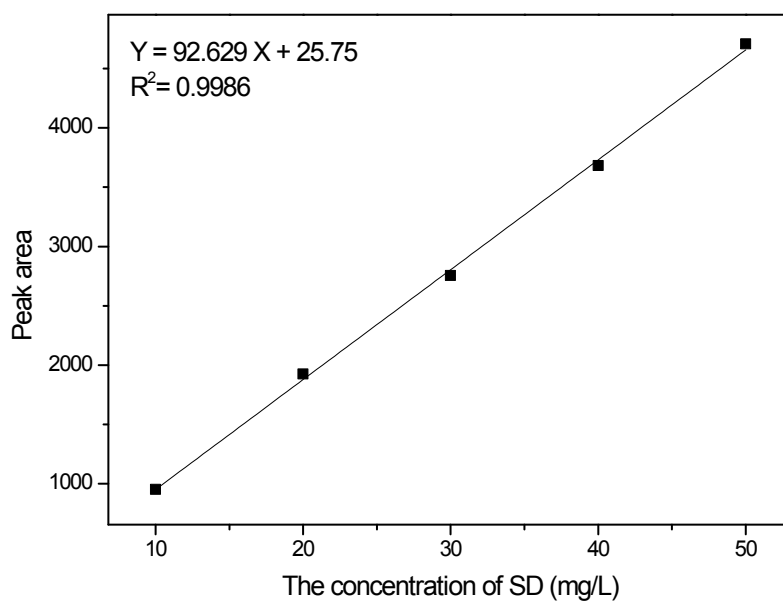

Fig.S1 Standard curve of SD(HPLC)

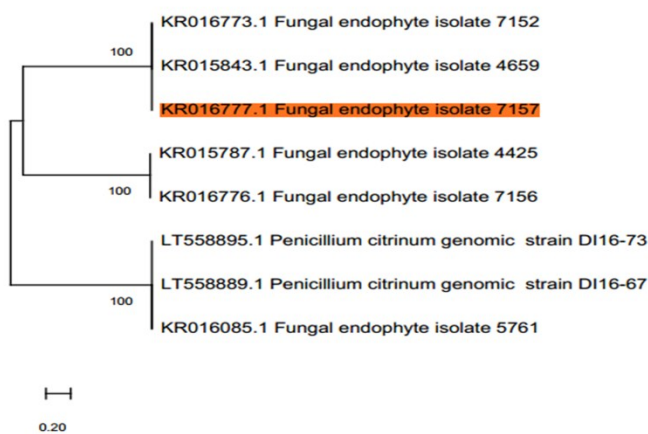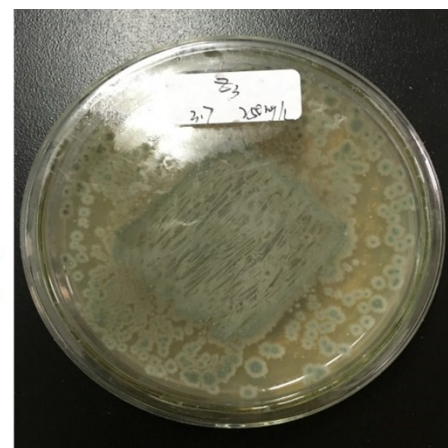

Fig.S2 Phylogenetic tree of strain Z3 (Fungal endophyte isolate 7156)

Table S1

Results of biochemical tests on microbial strain T2

| Test              | Phenomenon          | Result |
|-------------------|---------------------|--------|
| Catalase          | oxygen              | +      |
| Indole            | No change in colour | -      |
| Methyl red        | Faded to yellow     | -      |
| Starch hydrolysis | Hydrolysed          | +      |

Table S2 Recoveries of sulfadiazine at different concentrations

| Antibiotic   | Initial concentration (mg·kg <sup>-1</sup> ) | Recovery±SD (%) |
|--------------|----------------------------------------------|-----------------|
| sulfadiazine | 40                                           | 79.22±4.25      |
|              | 60                                           | 89.71±5.97      |
|              | 100                                          | 92.49±3.94      |

UPLC-Q-TOF-MS spectrum of SD intermediates (method 1)

| Compound Label                                         | <i>m/z</i> | RT    | Algorithm       | Mass      |
|--------------------------------------------------------|------------|-------|-----------------|-----------|
| Cpd 51: C <sub>6</sub> H <sub>7</sub> N O <sub>2</sub> | 126.0548   | 0.989 | Find By Formula | 125.04761 |

MS Zoomed Spectrum

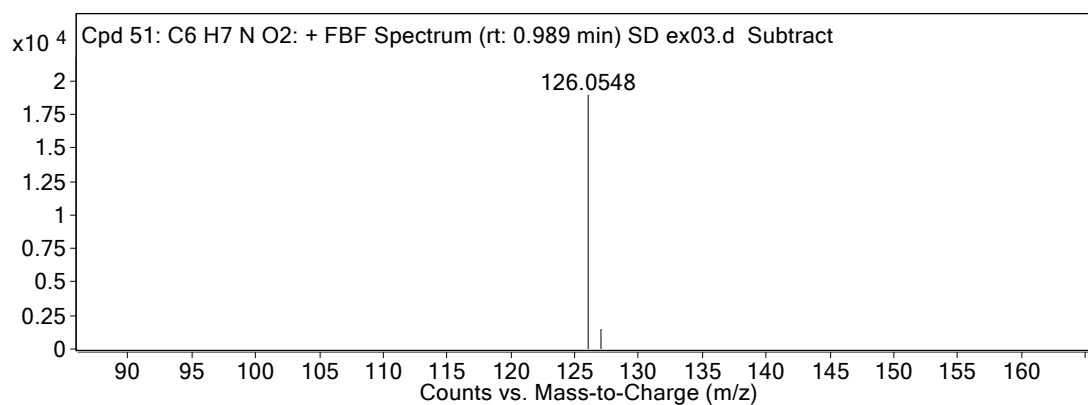

| Compound Label                                                             | <i>m/z</i> | RT    | Algorithm       | Mass      |
|----------------------------------------------------------------------------|------------|-------|-----------------|-----------|
| Cpd 44: C <sub>10</sub> H <sub>10</sub> N <sub>4</sub> O <sub>3</sub><br>S | 267.0547   | 2.594 | Find By Formula | 266.04749 |

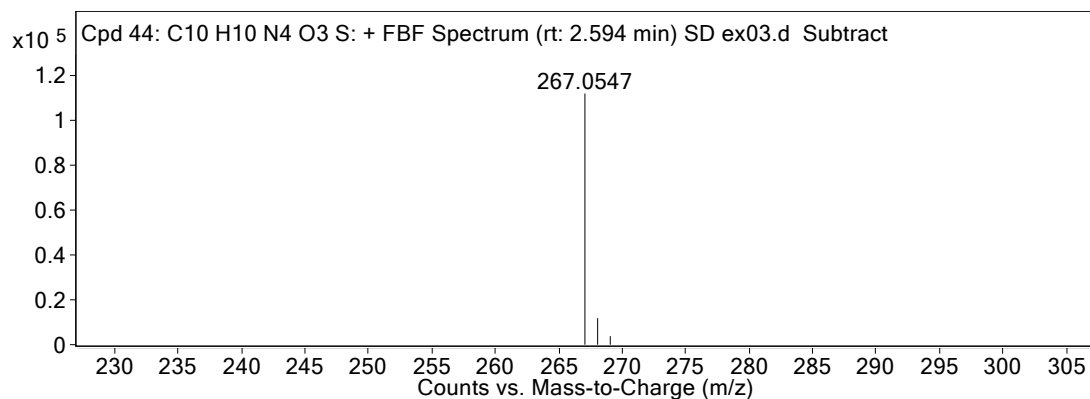

| Compound Label                                                          | <i>m/z</i> | RT    | Algorithm       | Mass     |
|-------------------------------------------------------------------------|------------|-------|-----------------|----------|
| Cpd 25: C <sub>10</sub> H <sub>10</sub> N <sub>4</sub> O <sub>2</sub> S | 251.062    | 2.826 | Find By Formula | 250.0543 |

MS Zoomed Spectrum

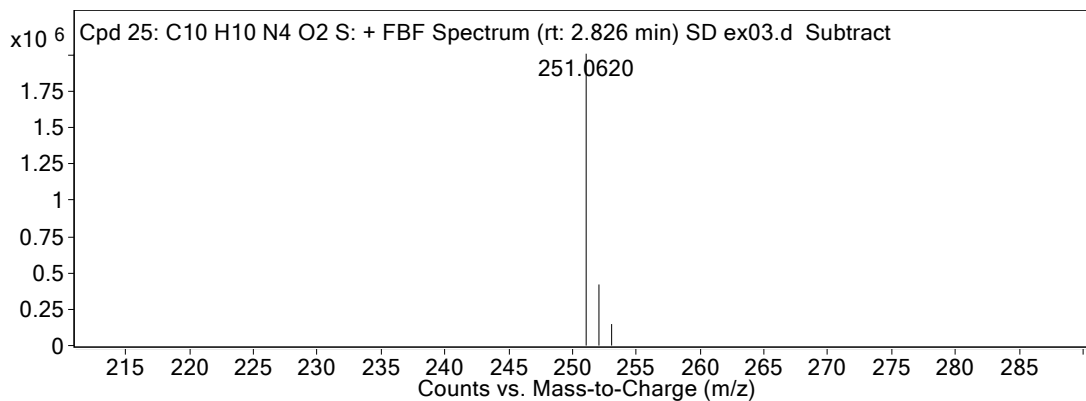

| Compound Label                                                         | <i>m/z</i> | RT    | Algorithm       | Mass      |
|------------------------------------------------------------------------|------------|-------|-----------------|-----------|
| Cpd 26: C <sub>10</sub> H <sub>9</sub> N <sub>3</sub> O <sub>3</sub> S | 252.0439   | 2.975 | Find By Formula | 251.03503 |

MS Zoomed Spectrum

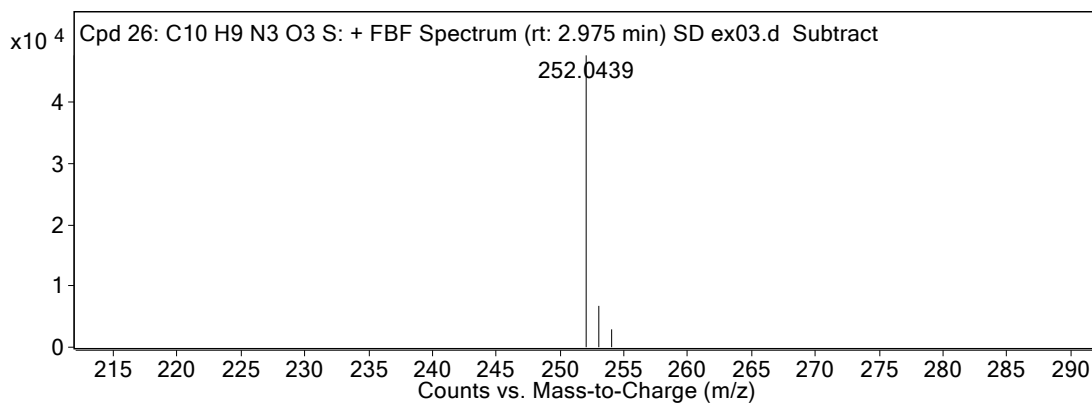

| Compound Label                                       | <i>m/z</i> | RT    | Algorithm       | Mass      |
|------------------------------------------------------|------------|-------|-----------------|-----------|
| Cpd 14: C <sub>6</sub> H <sub>6</sub> O <sub>2</sub> | 111.044    | 3.123 | Find By Formula | 110.03675 |

MS Zoomed Spectrum

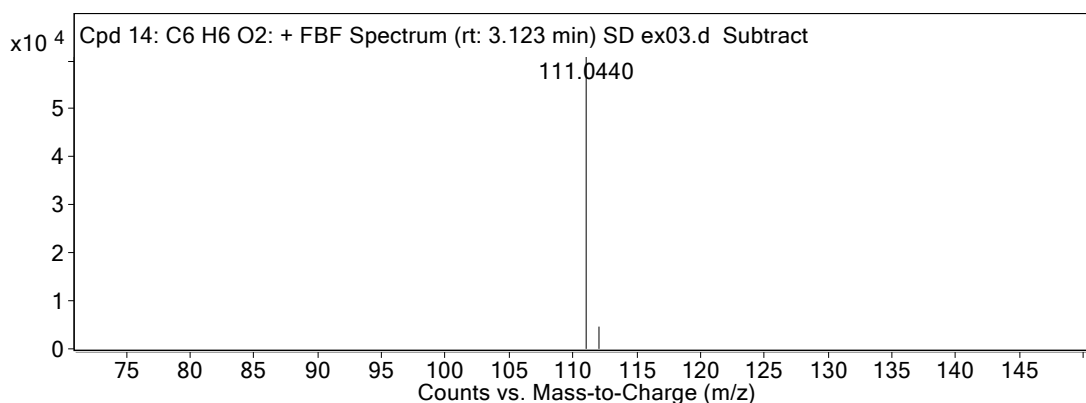

| Compound Label                            | <i>m/z</i> | RT    | Algorithm       | Mass      |
|-------------------------------------------|------------|-------|-----------------|-----------|
| Cpd 10: C <sub>8</sub> H <sub>9</sub> N O | 136.0757   | 3.653 | Find By Formula | 135.06873 |

MS Zoomed Spectrum

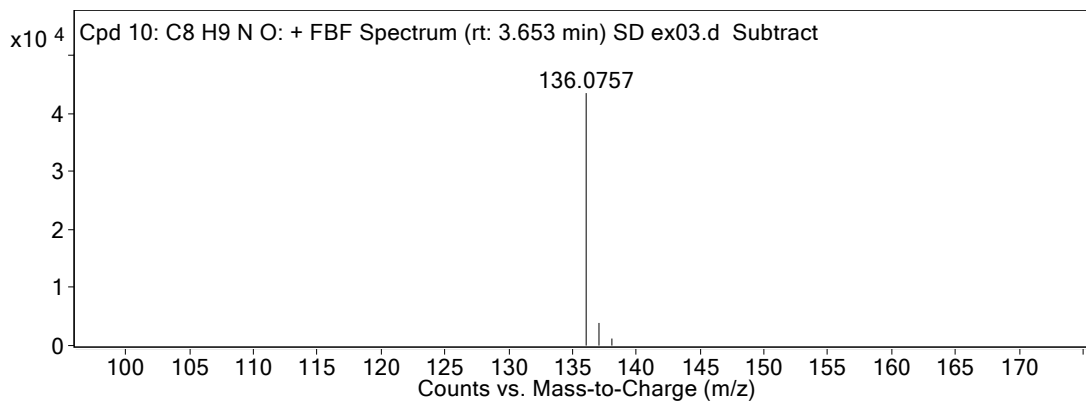

| Compound Label                                                             | <i>m/z</i> | RT    | Algorithm       | Mass      |
|----------------------------------------------------------------------------|------------|-------|-----------------|-----------|
| Cpd 32: C <sub>10</sub> H <sub>10</sub> N <sub>4</sub> O <sub>4</sub><br>S | 283.0489   | 7.443 | Find By Formula | 282.04148 |

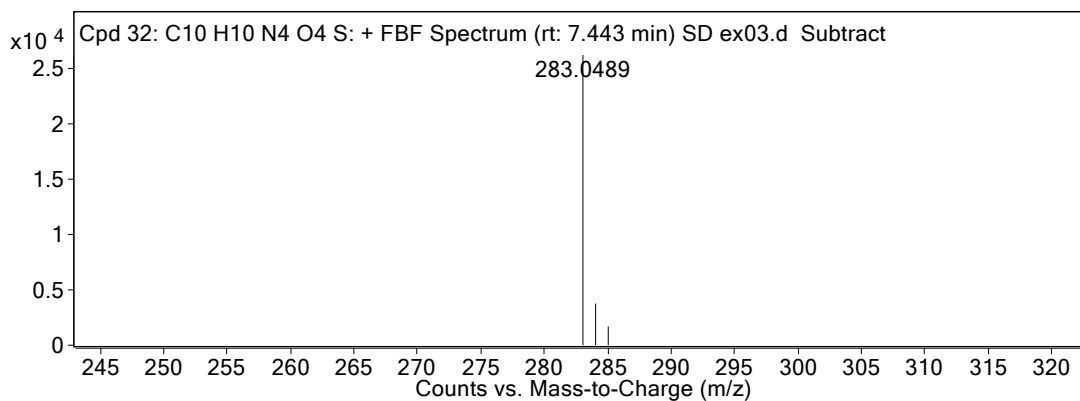

| Compound Label                                                            | <i>m/z</i> | RT    | Algorithm       | Mass      |
|---------------------------------------------------------------------------|------------|-------|-----------------|-----------|
| Cpd 6: C <sub>10</sub> H <sub>12</sub> N <sub>2</sub> O <sub>5</sub><br>S | 273.0541   | 4.447 | Find By Formula | 272.04678 |

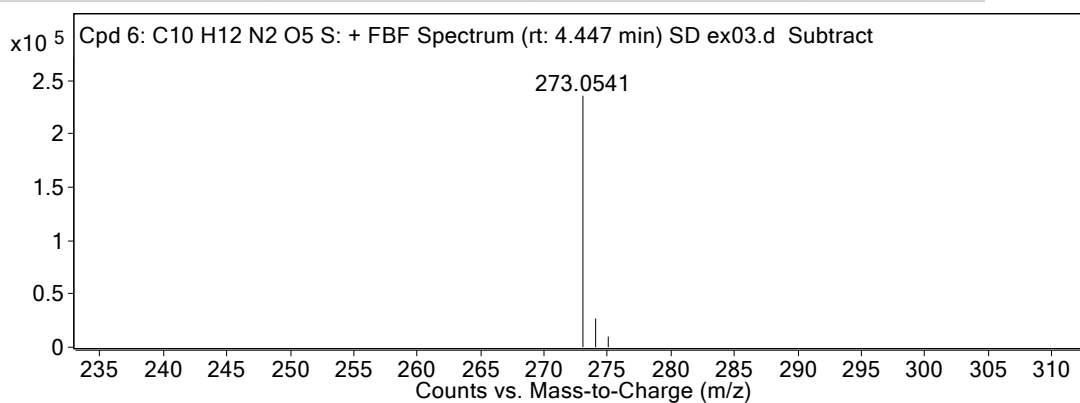

| Compound Label                                       | <i>m/z</i> | RT    | Algorithm       | Mass      |
|------------------------------------------------------|------------|-------|-----------------|-----------|
| Cpd 15: C <sub>5</sub> H <sub>6</sub> O <sub>3</sub> | 115.0389   | 6.483 | Find By Formula | 114.03181 |

MS Zoomed Spectrum

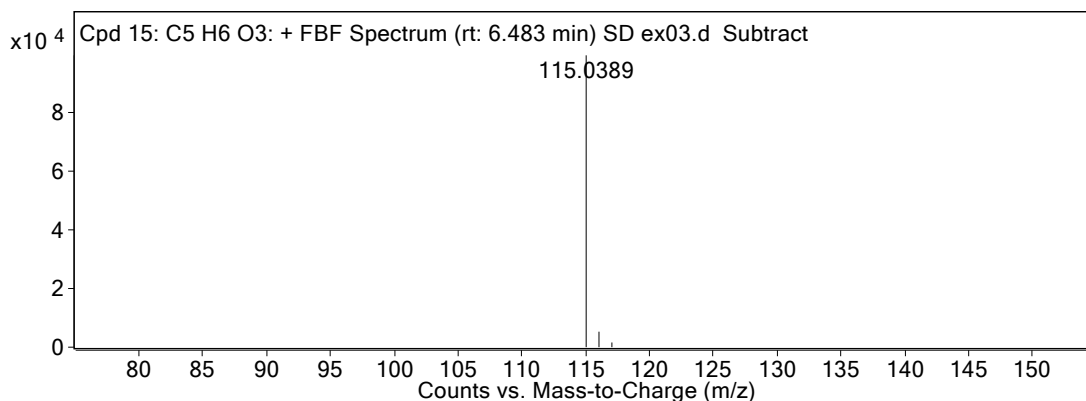

UPLC-Q-TOF-MS spectrum of SD intermediates (method 2)

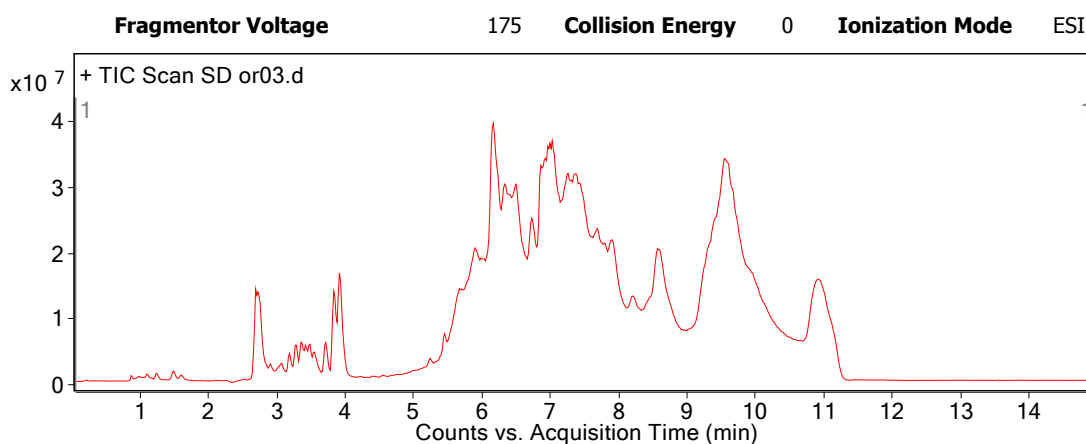

| Compound Label          | <i>m/z</i> | RT    | Algorithm       | Mass      |
|-------------------------|------------|-------|-----------------|-----------|
| Cpd 41: C12 H12 N4 O4 S | 309.0648   | 3.023 | Find By Formula | 308.05766 |

MS Zoomed Spectrum

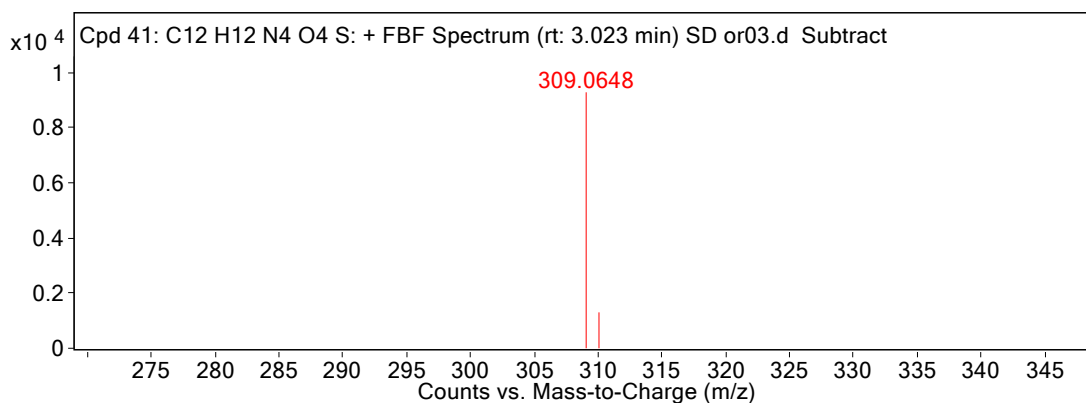

| Compound Label          | <i>m/z</i> | RT    | Algorithm       | Mass      |
|-------------------------|------------|-------|-----------------|-----------|
| Cpd 27: C12 H12 N4 O3 S | 293.0705   | 3.106 | Find By Formula | 292.06313 |

MS Zoomed Spectrum

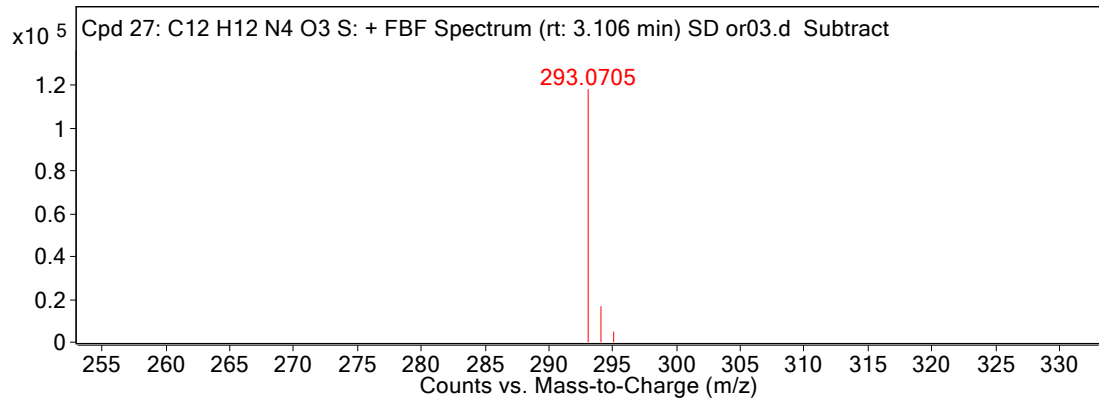

Supplement: c9ra07302g1.pdf [file c9ra07302g1.pdf]
